# Supplementary material
Source: HighWire-hosted journal article supplement (https://bmjopen.bmj.com/content/14/1/e075316)
Supplement: inline-supplementary-material-1 [file inline-supplementary-material-1.pdf]

## Supplementary File

| <b>Extraction Template</b>                                                      |  |
|---------------------------------------------------------------------------------|--|
| <b>TITLE</b>                                                                    |  |
| <b>AUTHOR</b>                                                                   |  |
| <b>PUBLICATION and DATE</b> e.g.,<br>Journal                                    |  |
| <b>SOURCE</b> e.g., database found                                              |  |
| <b>EVIDENCE TYPE</b> e.g.,<br>Qualitative                                       |  |
| <b>STUDY Question &amp; Aim</b>                                                 |  |
| <b>DISEASE INCLUSION</b> (e.g., UA<br>only or combined UA and<br>endometriosis) |  |
| <b>CONCEPTUAL<br/>DEFINITIONS</b>                                               |  |
| <b>FINDINGS / THEMES</b>                                                        |  |
| <b>CONCLUSION</b>                                                               |  |
| Sample size - Population                                                        |  |
| Demographics - Population                                                       |  |
| Means of Diagnosis -<br>Population                                              |  |
| race/ethnicity - Population                                                     |  |
|                                                                                 |  |
| Methodological approach -<br>Concept                                            |  |
| Method of data collection -<br>Concept                                          |  |
| Factors investigated or identified<br>- Concept                                 |  |
| Impacts of disease - Concept                                                    |  |

|                                                                           |  |
|---------------------------------------------------------------------------|--|
| Perceptions of diagnostic journey - Concept                               |  |
|                                                                           |  |
| Origin of study (geography) - Context                                     |  |
| Study setting e.g., community or clinic -Context                          |  |
| Means of recruitment and setting e.g., local clinic on one week - Context |  |
| Means of data collection and setting - Context                            |  |
|                                                                           |  |
